# Supplementary material for: Tomographic changes after implantation of a refractive corneal inlay in presbyopic patients
Source: Research Square preprint supplement (doi:10.21203/rs.3.rs-8550499/v1), 2026-01-22
Supplement: Supplementary file 1 [file 24b84191835092ccc4508224.docx]

| **Time point** | **K1 (D)** | **K2 (D)** | **Astigmatism (D)** | **Km (D)** |
| --- | --- | --- | --- | --- |
| **simK** |  |  |  |  |
| preoperative | 42.45 ± 1.50 | 43.17 ± 1.65 | 0.78 ± 0.38 | 42.81 ± 1.56 |
| M1 | 42.38 ± 1.54 | 43.51 ± 1.70* | 1.15 ± 0.44* | 42.95 ± 1.60 |
| M3 | 42.32 ± 1.60 | 43.55 ± 1.77* | 1.23 ± 0.52* | 42.95 ± 1.65 |
| M6 | 42.41 ± 1.48 | 43.47 ± 1.60* | 1.08 ± 0.49* | 42.93 ± 1.53 |
| M12 | 42.30 ± 1.59 | 43.51 ± 1.70* | 1.22 ± 0.53* | 42.88 ± 1.63 |
| **TCRP keratometry** |  |  |  |  |
| preoperative | 41.80 ± 1.58 | 42.44 ± 1.63 | 0.64 ± 0.39 | 42.12 ± 1.59 |
| M1 | 42.18 ± 1.53 | 43.11 ± 1.59* | 0.92 ± 0.43* | 42.62 ± 1.55* |
| M3 | 42.03 ± 1.58 | 43.08 ± 1.82* | 1.06 ± 0.55* | 42.56 ± 1.68* |
| M6 | 42.05 ± 1.52 | 43.13 ± 1.51* | 1.08 ± 0.58* | 42.59 ± 1.49* |
| M12 | 41.95 ± 1.62 | 43.02 ± 1.65* | 1.07 ± 0.45* | 42.49 ± 1.62* |

D: diopter; K1: flat keratometry; K2: steep keratometry; Km: mean keratometry; M1: one month postoperative; M3: three months postoperative; M6: six months postoperative; M12: twelve months postoperative; simK: simulated keratometry; TCRP: total corneal refractive power; *: statistically significant (p<0.05)
