# Supplementary material for: Tomographic changes after implantation of a refractive corneal inlay in presbyopic patients
Source: Research Square preprint supplement (doi:10.21203/rs.3.rs-8550499/v1), 2026-01-22
Supplement: Supplementary file 2 [file 38a83a6a9dbbf4852e69fd13.docx]

| **Time point** | **K1 (D)** | **K2 (D)** | **Km (D)** | **TCRP - K1 (D)** | **TCRP - K2 (D)** | **TCRP – Asti (D)** |
| --- | --- | --- | --- | --- | --- | --- |
| preoperative | 41.6 | 42.4 | 42.0 | 40.7 | 41.3 | 0.6 |
| M1 | 40.9 | 42.7 | 41.8 | 40.3 | 41.5 | 1.2 |
| M3 | 41.0 | 42.7 | 41.9 | 40.5 | 41.4 | 0.9 |
| M6 | 41.3 | 42.7 | 42.0 | 41.1 | 41.7 | 0.6 |
| 1 day post expl. | 41.1 | 42.3 | 41.7 | 40.3 | 41.0 | 0.7 |
| 6w post expl. | 41.3 | 42.4 | 41.8 | 40.4 | 41.0 | 0.6 |

Asti: astigmatism; D: diopter; K1: flat keratometry; K2: steep keratometry; Km: mean keratometry; M1: one month postoperative; M3: three months postoperative; M6: six months postoperative; TCRP: total corneal refractive power; 1 day post expl.: 1 day after explantation; 6w post expl.: 6 weeks after explantation
