# Supplementary material for: Tomographic changes after implantation of a refractive corneal inlay in presbyopic patients
Source: Research Square preprint supplement (doi:10.21203/rs.3.rs-8550499/v1), 2026-01-22
Supplement: Supplementary file 3 [file 44f49cabc21c624bd774bdb8.docx]

|  | **Densitometry in Grayscale units** | | |
| --- | --- | --- | --- |
|  | **0-2 mm Zone** | **2-6 mm Zone** | **6-10 mm Zone** |
| **anterior cornea** |  |  |  |
| preoperative | 21.1 ± 2.35 | 19.8 ± 3.09 | 27.4 ± 9.85 |
| M12 | 22.2 ± 2.97 | 21.4 ± 2.70* | 29.8 ± 7.85* |
| **central cornea** |  |  |  |
| preoperative | 13.5 ± 1.15 | 13.2 ± 2.04 | 20.4 ± 7.33 |
| M12 | 16.1 ± 2.02* | 14.9 ± 1.99* | 22.2 ± 5.94* |
| **total cornea** |  |  |  |
| preoperative | 14.5 ± 1.62 | 14.2 ± 2.37 | 21.4 ± 7.43 |
| M12 | 16.5 ± 1.91* | 15.8 ± 2.07* | 23.6 ± 5.09* |

mm: millimeter; M12: twelve months postoperative; *: statistically significant (p<0.05)
