# Supplementary material for: Tomographic changes after implantation of a refractive corneal inlay in presbyopic patients
Source: Research Square preprint supplement (doi:10.21203/rs.3.rs-8550499/v1), 2026-01-22
Supplement: Supplementary file 4 [file e1a1139e2202fb82419edf50.docx]

|  |  | **preoperative** | **M12** |
| --- | --- | --- | --- |
| **simK (D)** | J0 | 0.10 ± 0.26 | 0.36 ± 0.27 * |
|  | J45 | -0.17 ± 0.23 | -0.32 ± 0.37 * |
| **TCRP (D)** | J0 | 0.05 ± 0.27 | 0.31 ± 0.26 * |
|  | J45 | -0.15 ± 0.23 | -0.23 ± 0.35 |

D: diopter; M12: twelve months postoperative; simK: simulated keratometry; TCRP: total corneal refractive power; *: statistically significant (p<0.05)
